# Supplementary material for: Porous ZnO and ZnO–NiO composite nano/microspheres: synthesis, catalytic and biosensor properties
Source: Royal Society of Chemistry journal article supplement (doi:10.1039/c4ra08736d), 2014-01-01
Supplement: c4ra08736d1.pdf [file c4ra08736d1.pdf]

## *Electronic Supplementary Information (ESI)*

### **Porous ZnO and ZnO-NiO composite nano/microspheres: synthesis, catalytic and biosensor properties**

**Ji-Min Yang,<sup>ab</sup> Wei Zhang,<sup>b</sup> Qing Liu<sup>a</sup> and Wei-Yin Sun<sup>\*a</sup>**

<sup>a</sup> *Coordination Chemistry Institute, State Key Laboratory of Coordination Chemistry, School of Chemistry and Chemical Engineering, Nanjing National Laboratory of Microstructures, Nanjing University, Nanjing 210093, China. E-mail: sunwy@nju.edu.cn; Fax: +86 25 83314502*

<sup>b</sup> *School of Chemistry & Chemical Engineering, Linyi University, Linyi 276005, China*

#### **Apparatus and materials**

The CILE was prepared by hand-mixing of ionic liquid BMIMPF<sub>6</sub> with graphite powder at a ratio of 1/4 (w/w) in an agate mortar. The homogeneous paste was packed firmly into one end of a glass tube with the diameter of 4 mm. The electrical contact was provided by inserting a copper wire to the paste in the inner hole of the tube. Prior to modification, the surface of the electrode was smoothed with a weighting paper. 10 μL of 1.0 mg mL<sup>-1</sup> nano-ZnO suspension was coated on the CILE and allowed to dry at room temperature, thus a uniform membrane modified electrode (ZnO/CILE) was obtained.

The 18-base oligonucleotides probe (ssDNA), its complementary DNA (cDNA, target DNA, namely an 18-base fragment of PML/RARA fusion gene sequence), single-base mismatched DNA, double-base mismatched DNA and noncomplementary DNA (ncDNA) were obtained from Shanghai Sangon Bioengineering Limited Company (Shanghai, China). Their base sequences are listed below:

probe DNA (ssDNA): 5'-TCT CAA TGG CTG CCT CCC-3';

target DNA (cDNA): 5'-GGG AGG CAG CCA TTG AGA-3';

single-base mismatched DNA: 5'-GGG AAG CAG CCA TTG AGA-3';

double-base mismatched DNA: 5'-GGG AAG CAG ACA TTG AGA-3';

ncDNA: 5'-AGT TCA TCC TGC GCT CTT-3'.

All oligonucleotides stock solutions of 18-base oligomers ( $1.0 \times 10^{-8}$  mol L<sup>-1</sup>) were prepared with Tris-HCl buffer (5.0 mmol L<sup>-1</sup> Tris-HCl, 50.0 mmol L<sup>-1</sup> NaCl, pH 7.0), and stored at 4 °C. More diluted solutions were obtained by diluting aliquot of the stock solution with ultrapure water prior to use. The hybridization solution was diluted with 2×SSC (pH 7.5), which consisted of 0.30 mol L<sup>-1</sup> NaCl and 0.03 mol L<sup>-1</sup> sodium citrate tribasic dihydrate (C<sub>6</sub>H<sub>5</sub>Na<sub>3</sub>O<sub>7</sub> · 2H<sub>2</sub>O).

### 2.3. Immobilization and hybridization of DNA

Immobilization of ssDNA probes was performed by immersing the ZnO/CILE into 2.0 mL Tris-HCl buffer solution (pH 7.0) containing  $1.0 \times 10^{-8}$  mol L<sup>-1</sup> ssDNA probes for 2 h at room temperature, followed by washing the electrode with 0.5% sodium dodecylsulfate (SDS) solution and then rinsing it with ultrapure water to remove the unimmobilized ssDNA, and this probe-captured electrode was denoted as ssDNA/ZnO/CILE.

The ssDNA/ZnO/CILE was immersed into a hybridization solution (2×SSC buffer, pH 7.5) containing the target DNA and hybridized at 0.4 V for 500 s, followed by washing the electrode with 0.5% SDS solution to remove the unhybridized DNA, and this hybridization modified electrode was denoted as dsDNA/ZnO/CILE. The hybridizations of probe ssDNA with single-base mismatched DNA, double-base mismatched DNA and ncDNA were carried out through similar procedure.

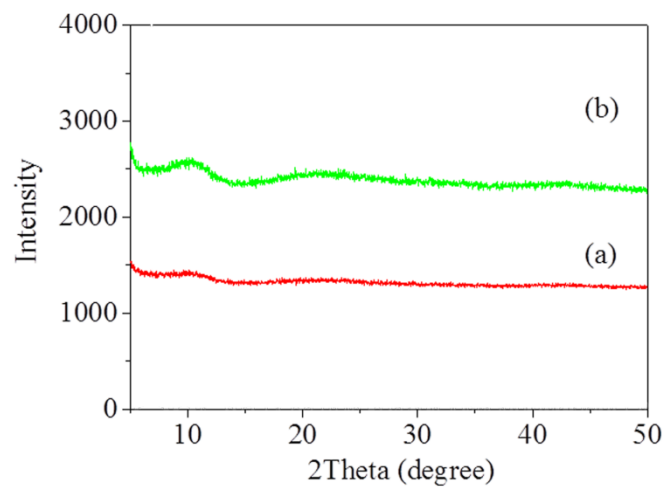

**Fig. S1** PXR D patterns of (a) Zn-CPPs and (b) Ni(II)-doped Zn-CPPs microspheres.

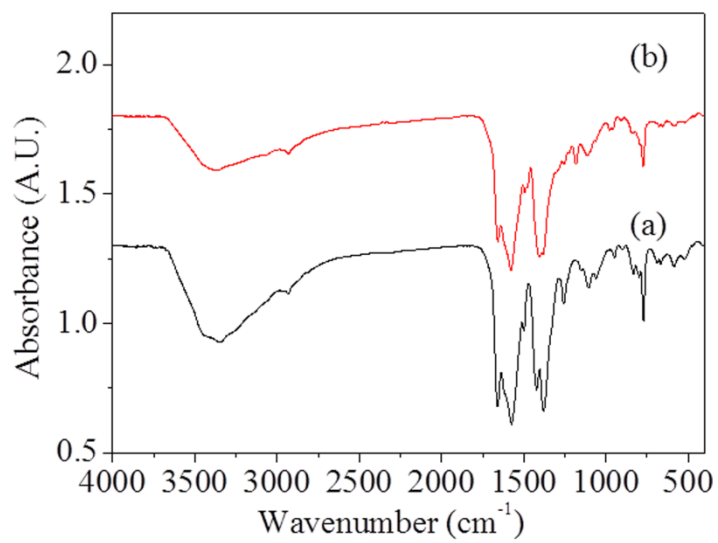

**Fig. S2** FT-IR spectra of (a) Zn-CPPs and (b) Ni(II)-doped Zn-CPPs microspheres.

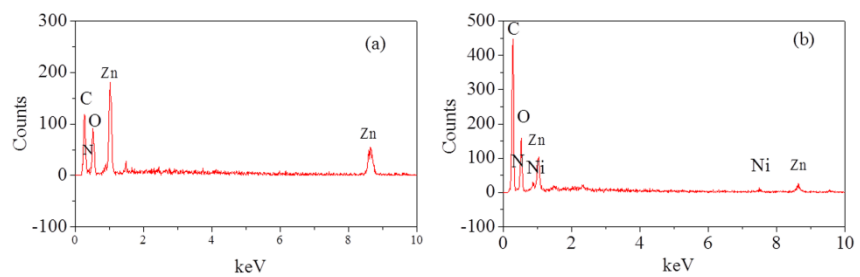

**Fig. S3** EDS spectra of (a) Zn-CPPs and (b) Ni(II)-doped Zn-CPPs microspheres.

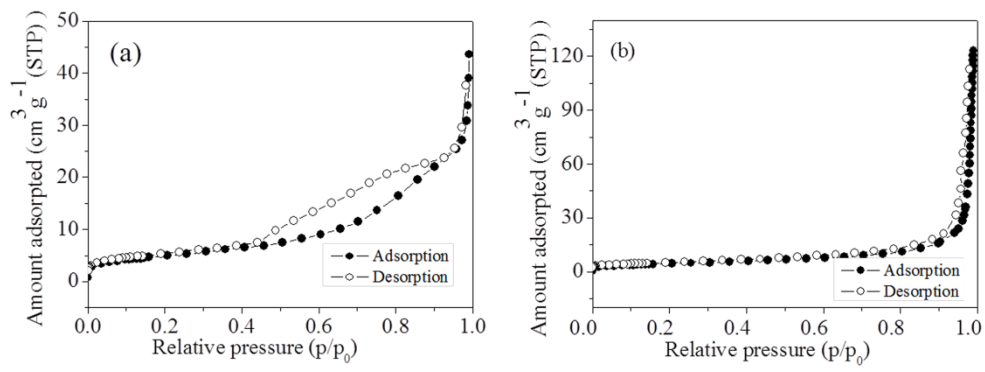

**Fig. S4**  $N_2$  adsorption-desorption isotherms of as-prepared products at 77 K: (a) ZnO and (b) ZnO-NiO composites.

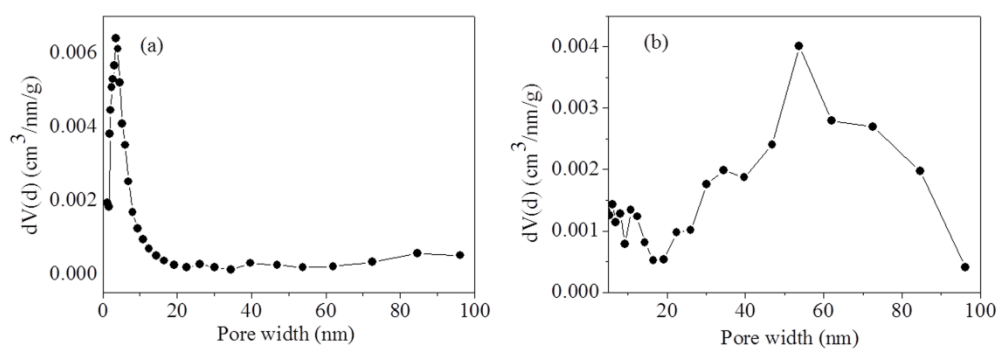

**Fig. S5** The pore size distributions of as-prepared products: (a) ZnO and (b) ZnO-NiO composites.

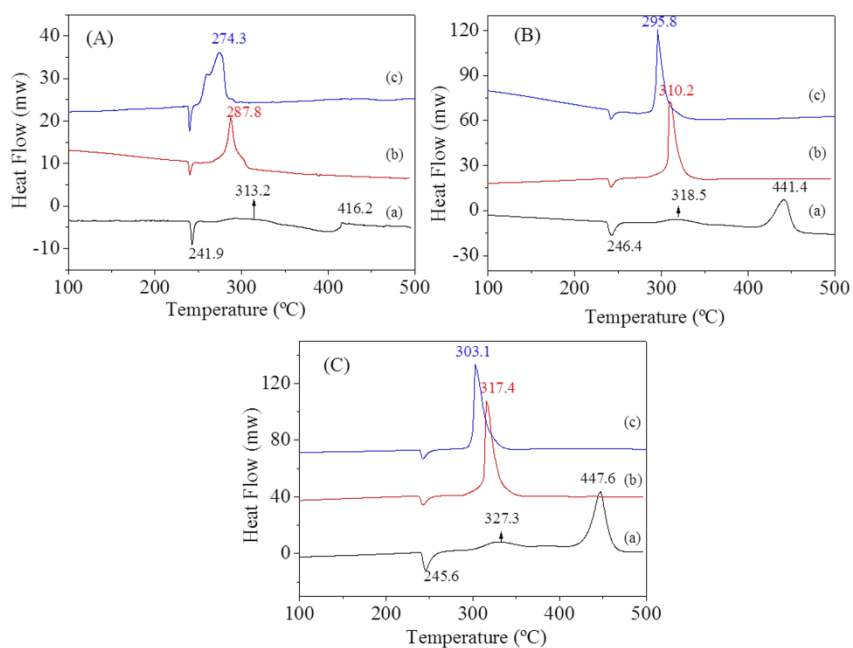

**Fig. S6** DSC curves at different heating rates of (A) 5 °C min<sup>-1</sup>, (B) 15 °C min<sup>-1</sup> and (C) 20 °C min<sup>-1</sup>, in absence and presence of different catalysts (a) pure AP, (b) AP + 2 wt% ZnO and (c) AP + 2 wt% ZnO-NiO composites.



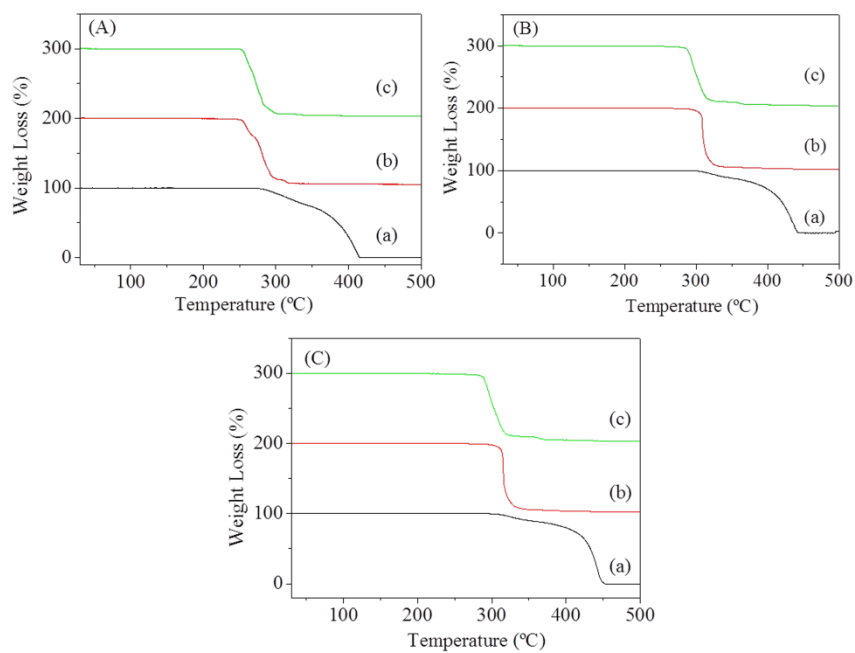

**Fig. S7** TGA curves at different heating rates of (A) 5 °C min<sup>-1</sup>, (B) 15 °C min<sup>-1</sup> and (C) 20 °C min<sup>-1</sup>, in absence and presence of different catalysts (a) pure AP, (b) AP + 2 wt% ZnO and (c) AP + 2 wt% ZnO-NiO composites.
